# Supplementary material for: Isolation and Biological Evaluation of Prenylated Flavonoids from Maclura pomifera
Source: Hindawi journal article supplement (doi:10.1155/2018/1370368), 2018-01-01
Supplement: f1 [file 1370368.f1.pdf]

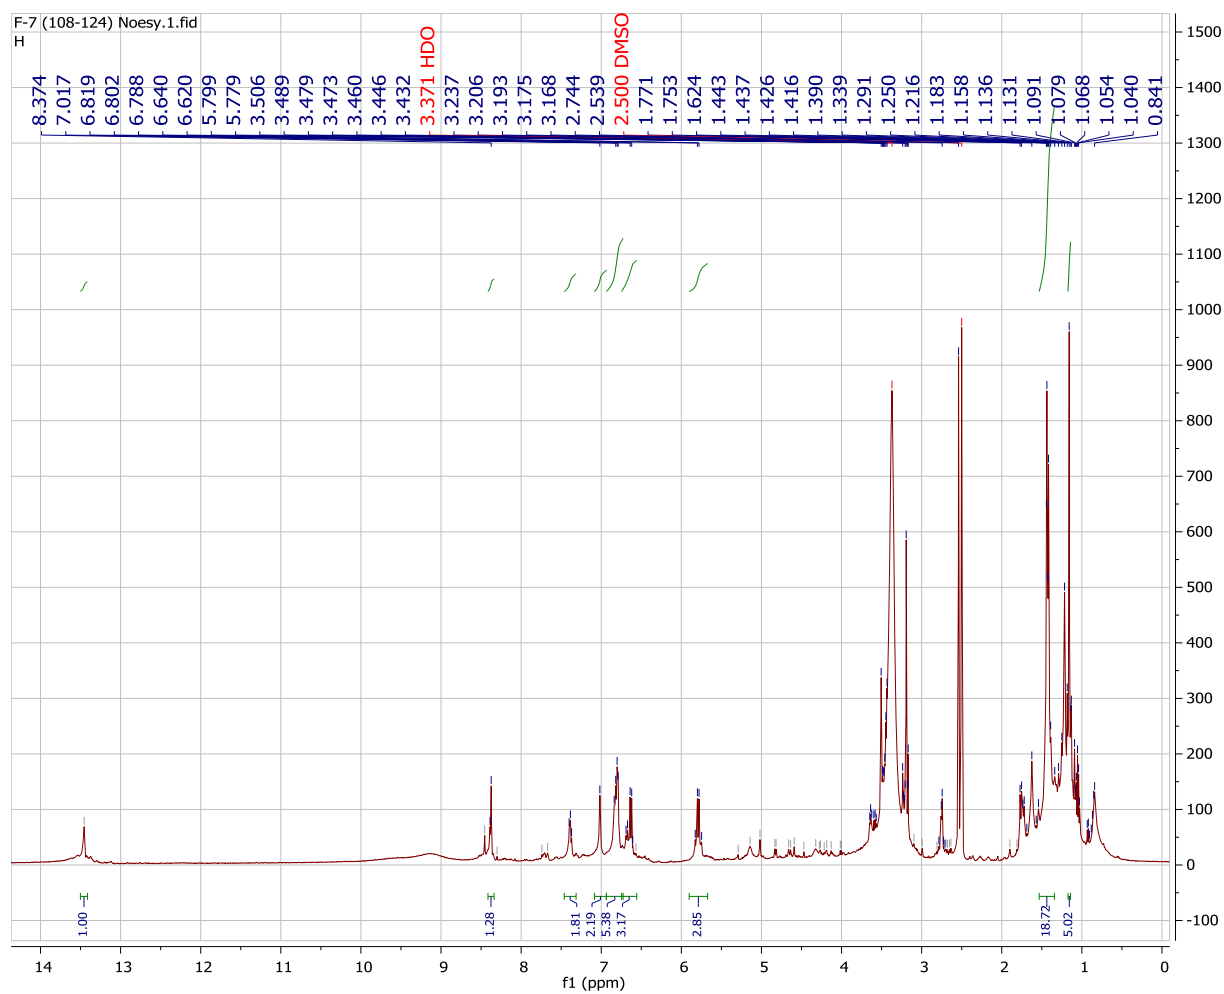

**Figure S1:**  $^1\text{H}$  NMR spectrum for compound **I** (DMSO- $d_6$ , 500 MHz)

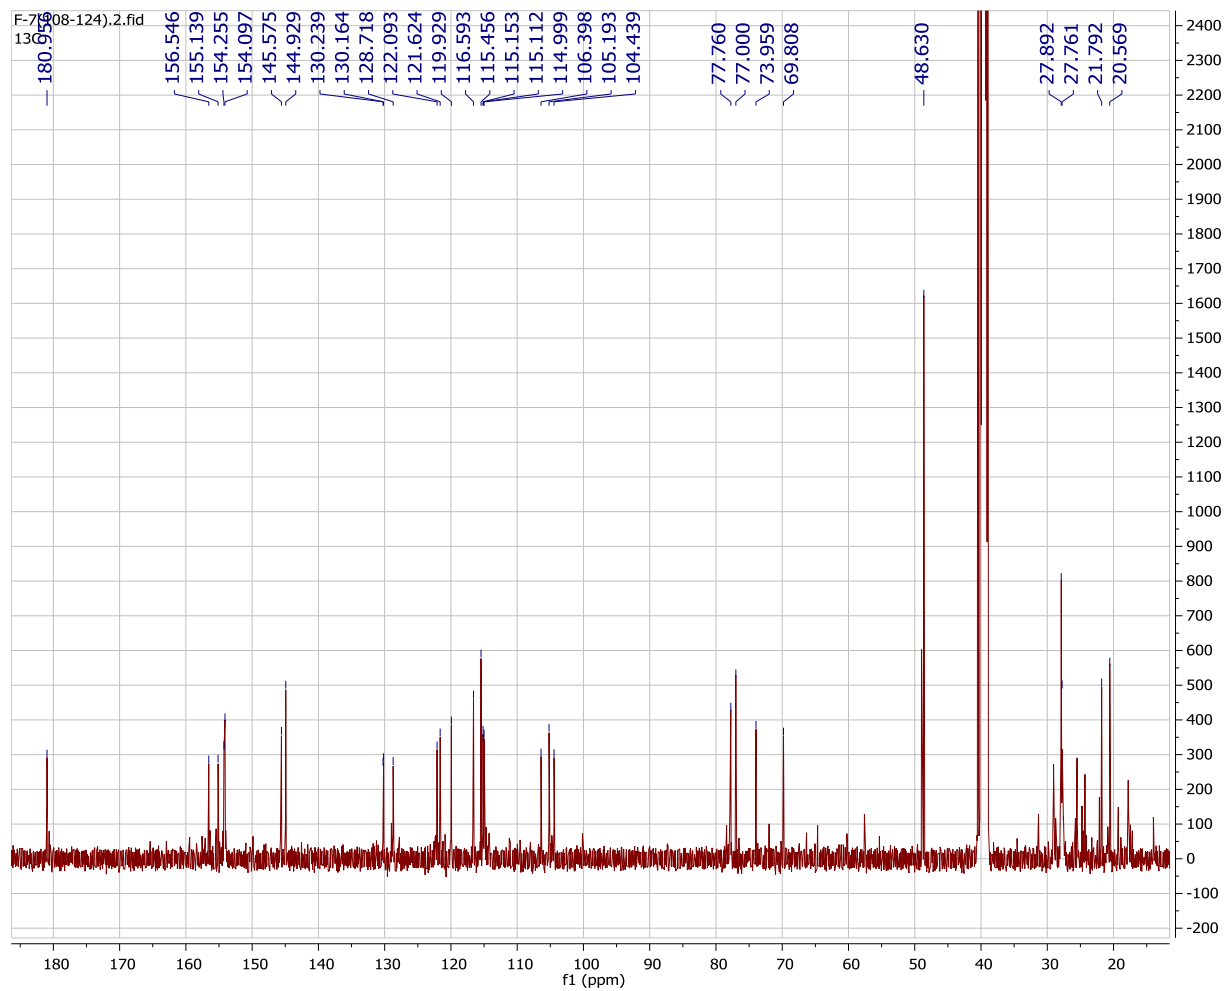

**Figure S2:**  $^{13}\text{C}$  NMR spectrum for compound **I** (DMSO- $d_6$ , 125 MHz)

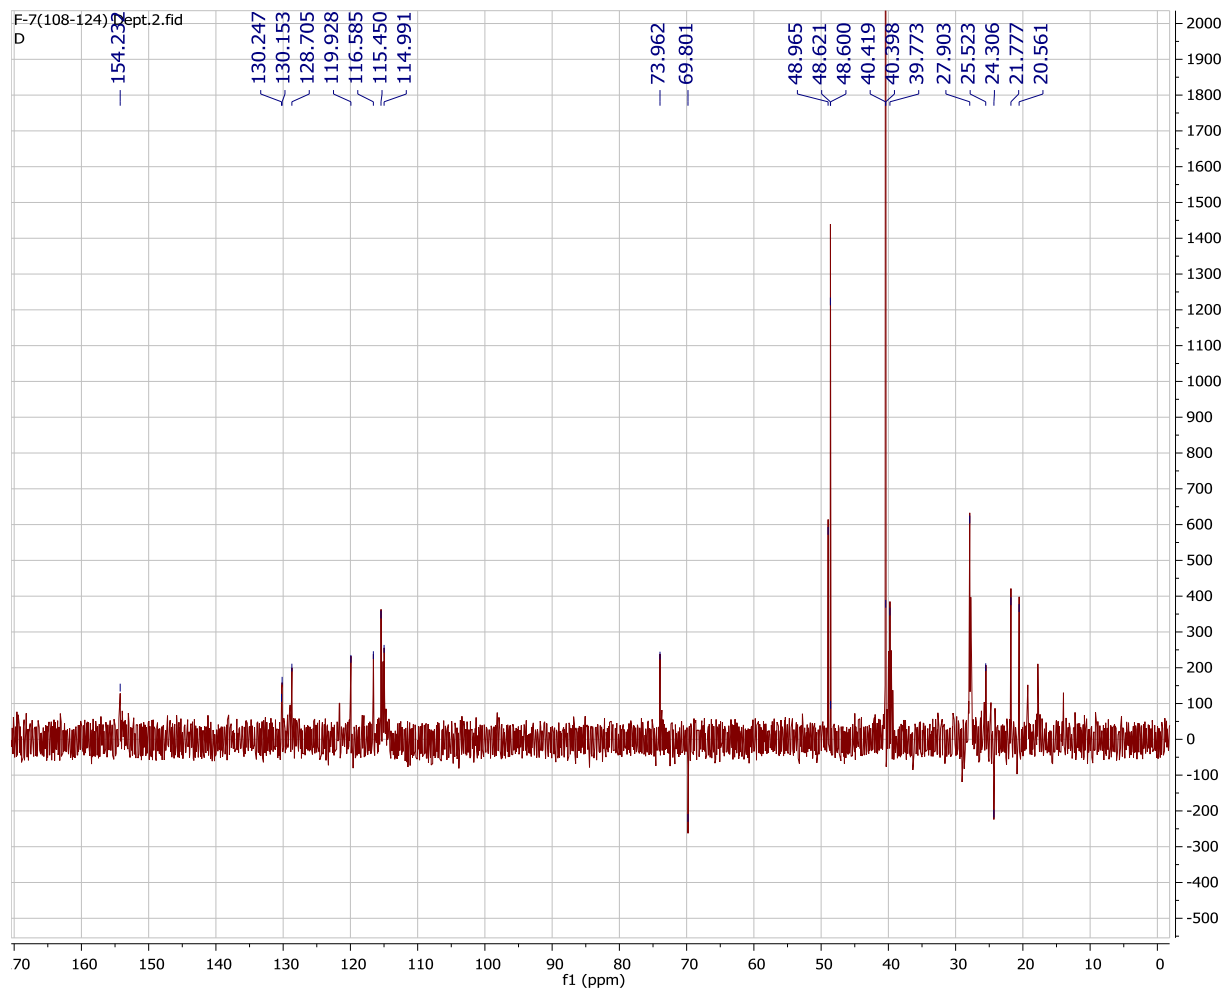

**Figure S3:** DEPT spectrum for compound I (DMSO-*d*<sub>6</sub>, 125 MHz)

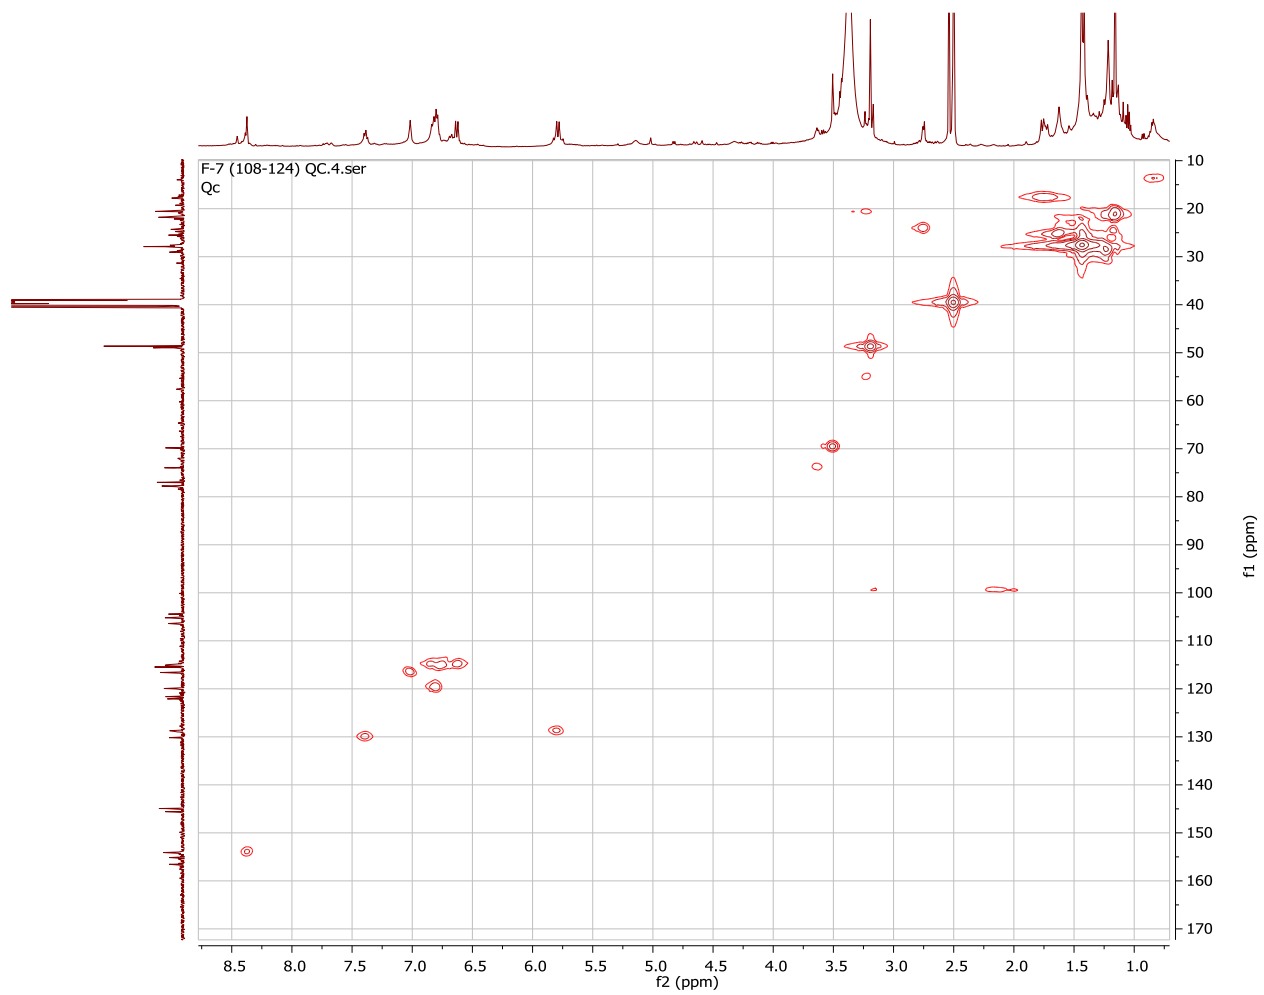

**Figure S4:** HSQC spectrum for compound **I** (DMSO-*d*<sub>6</sub>, 500 MHz)

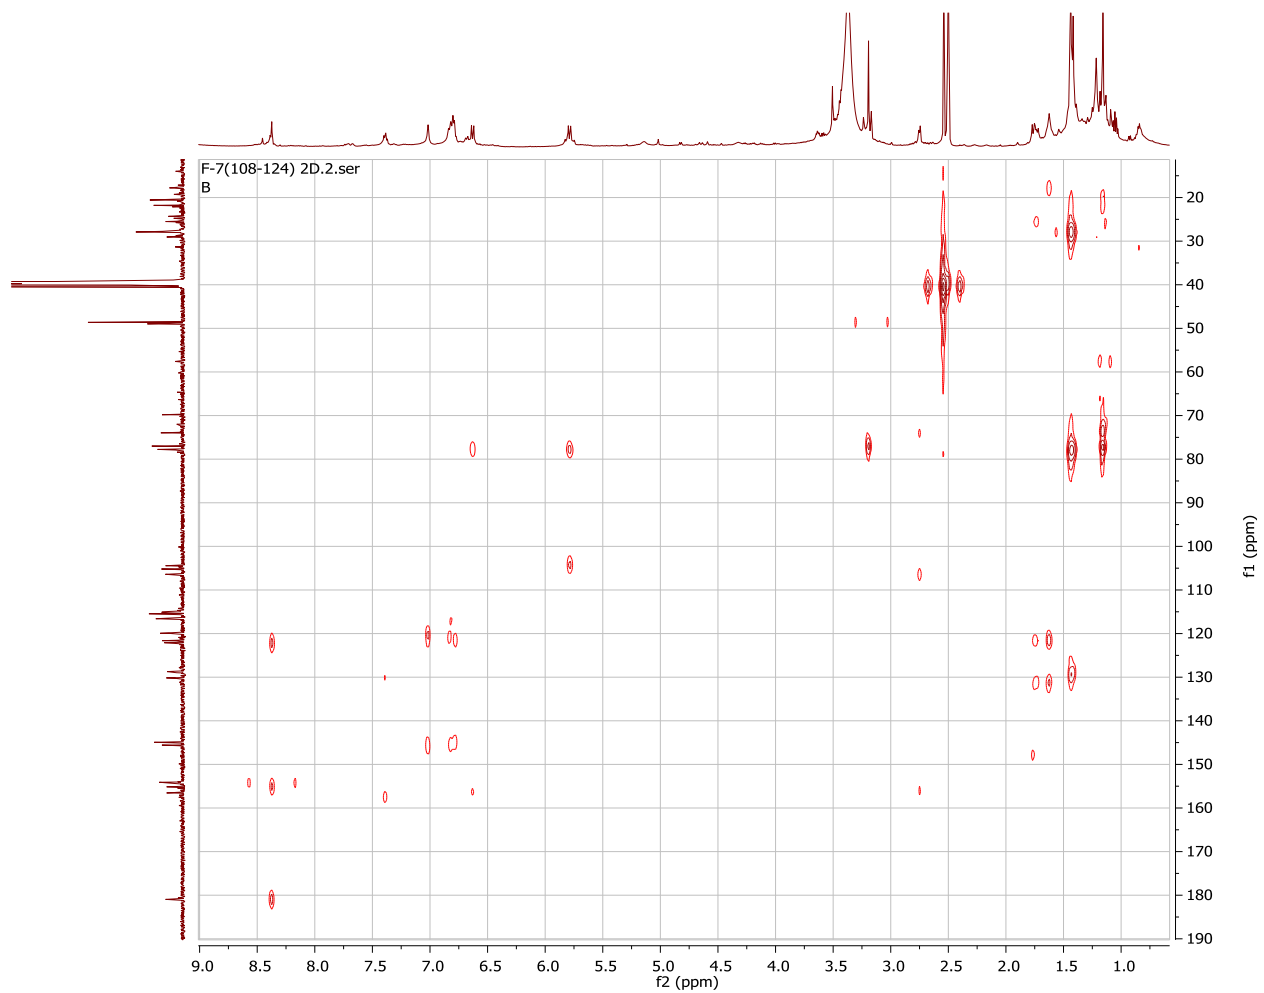

**Figure S5:** HMBC spectrum for compound I (DMSO-*d*<sub>6</sub>, 500 MHz)

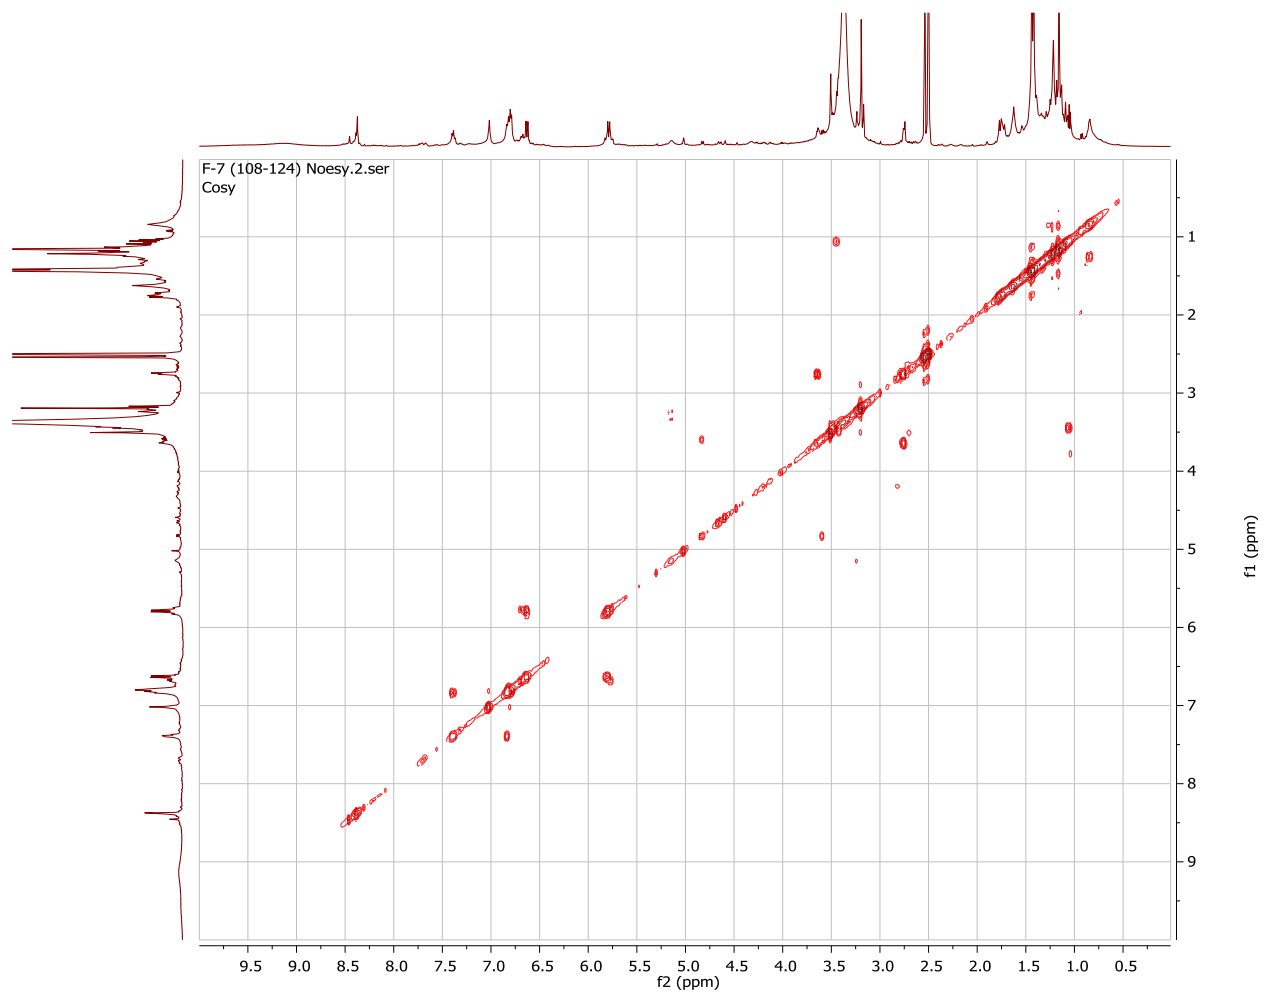

**Figure S6:** COSY spectrum for compound **I** (DMSO-*d*<sub>6</sub>, 500 MHz)

F-7-(108-124) #197 RT: 0.66 AV: 1 NL: 1.57E7  
T: FTMS + p ESI Full ms [350.0000-550.0000]

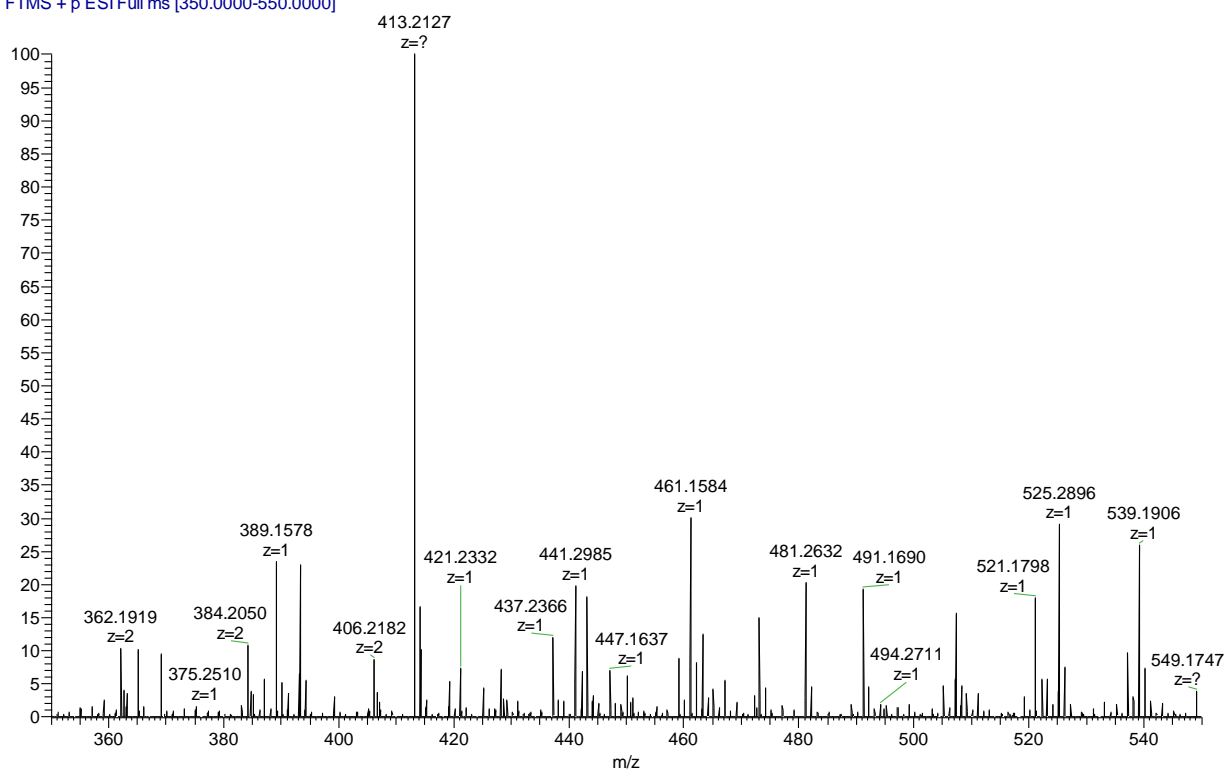

**Figure S7:** FT-MS spectrum for compound I

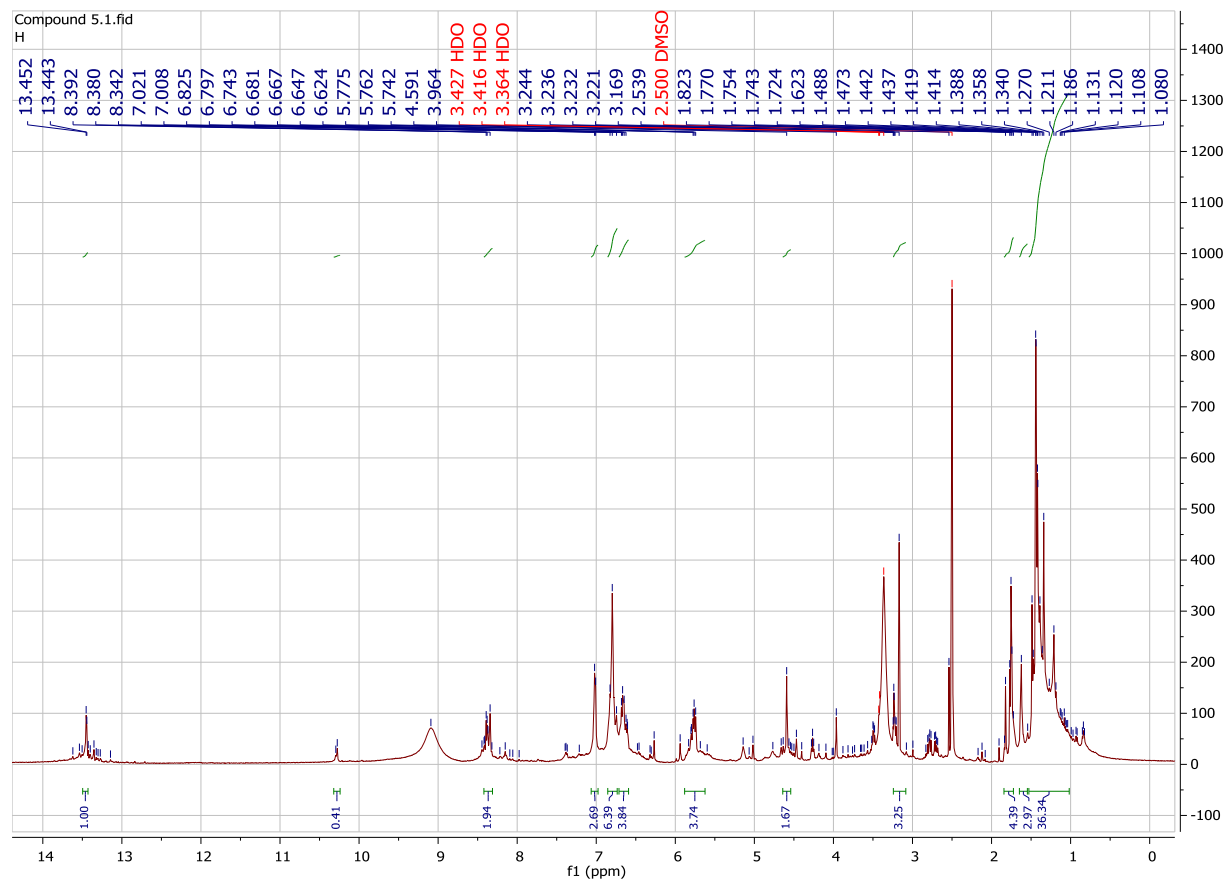

**Figure S8:**  $^1\text{H}$  NMR spectrum for compound **II** (DMSO- $d_6$ , 500 MHz)



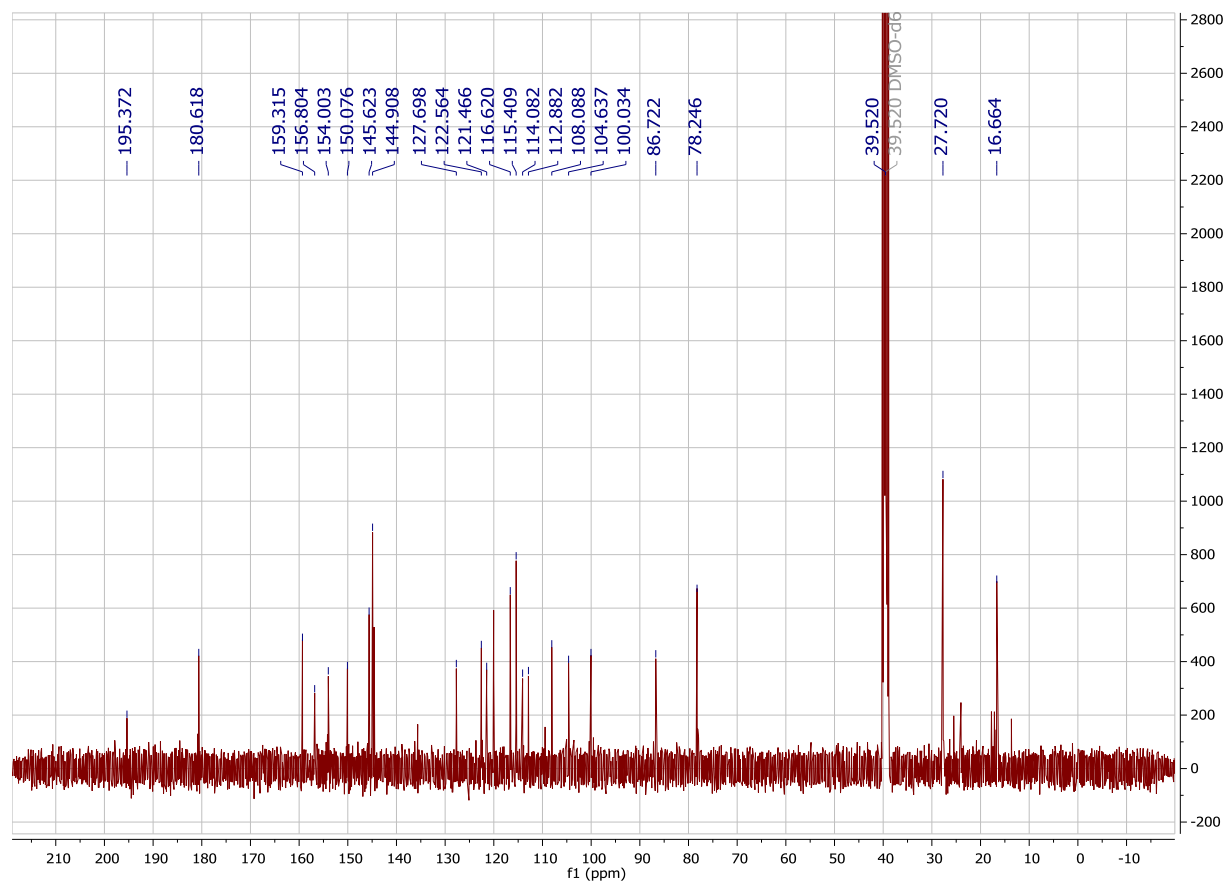

**Figure S9:**  $^{13}\text{C}$  NMR spectrum for compound II ( $\text{DMSO-}d_6$ , 125 MHz)

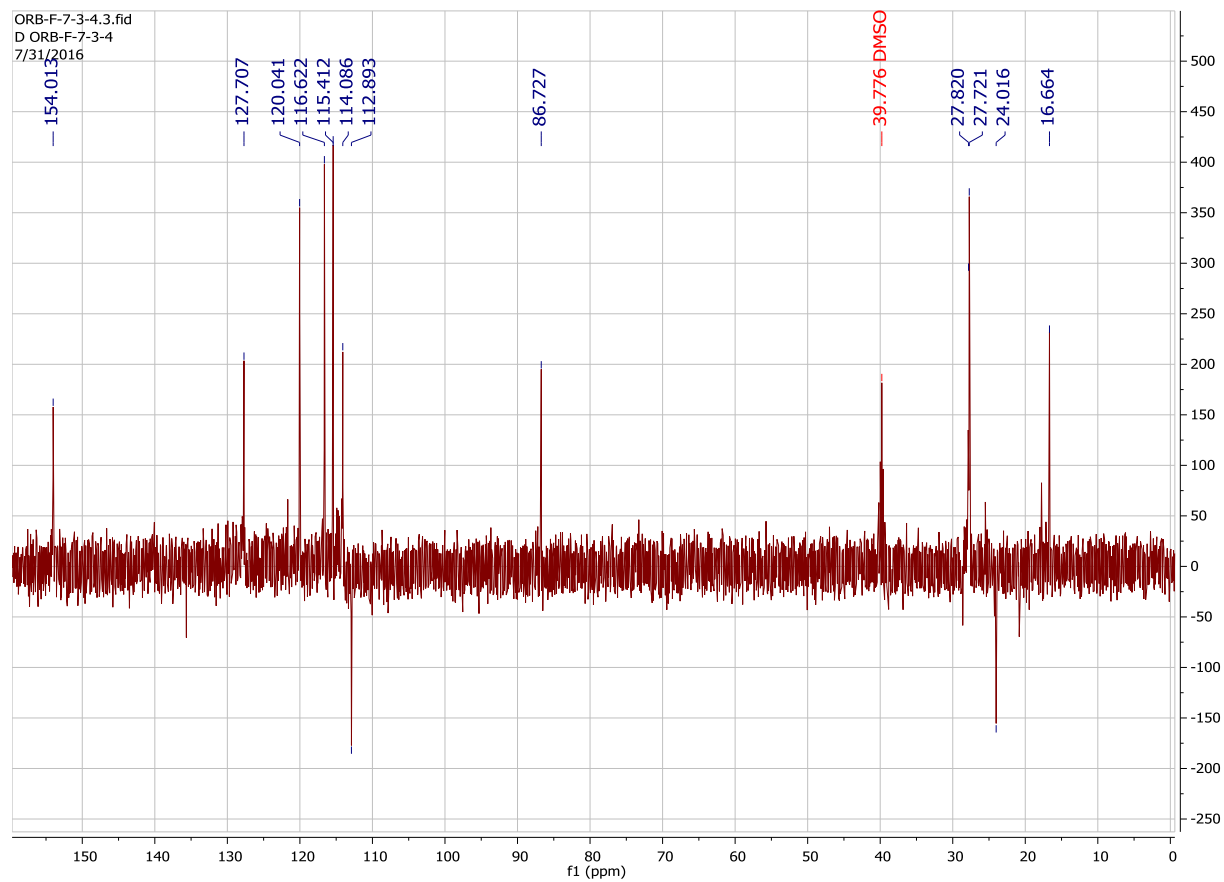

**Figure S10:** DEPT spectrum for compound **II** (DMSO-*d*<sub>6</sub>, 125 MHz)

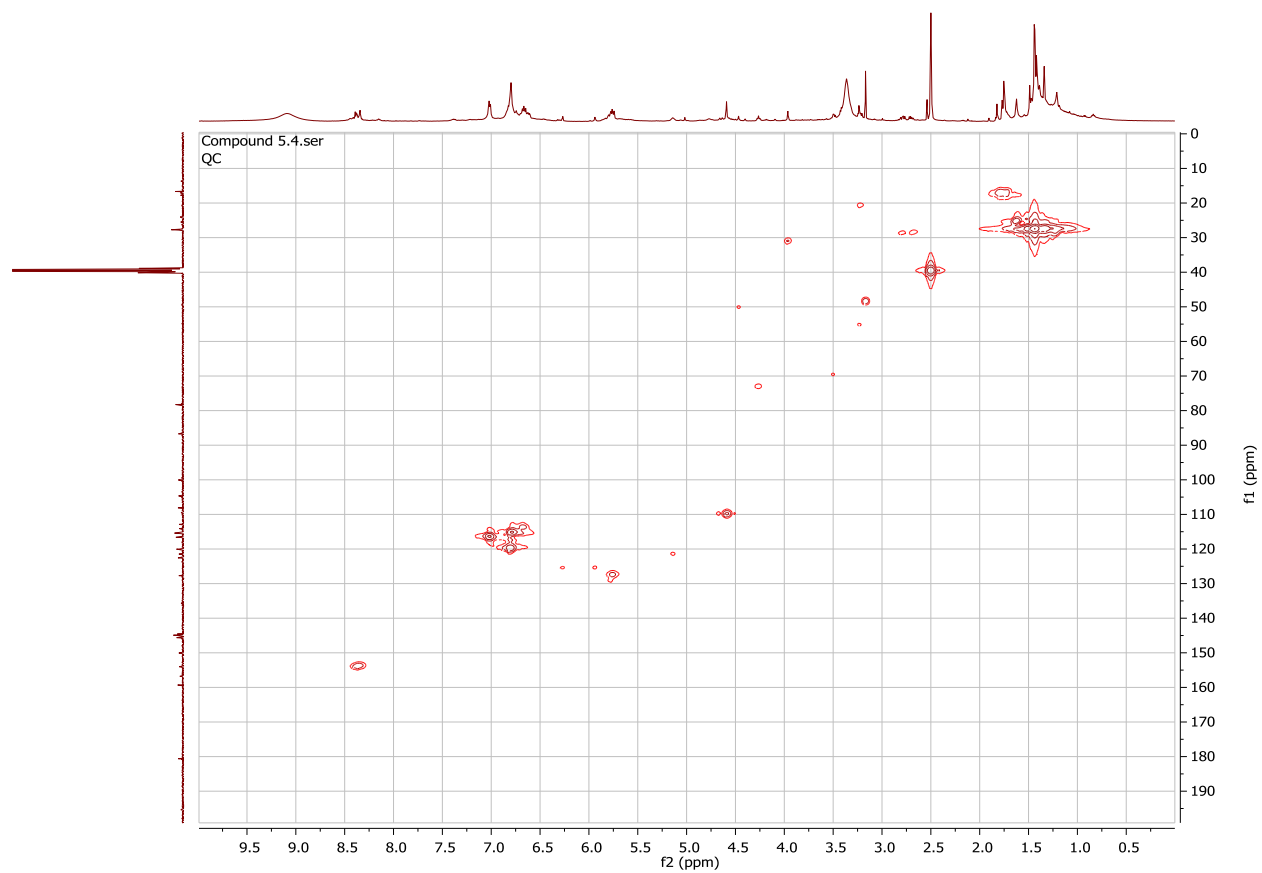

**Figure S11:** HSQC spectrum for compound **II** (DMSO-*d*<sub>6</sub>, 500 MHz)

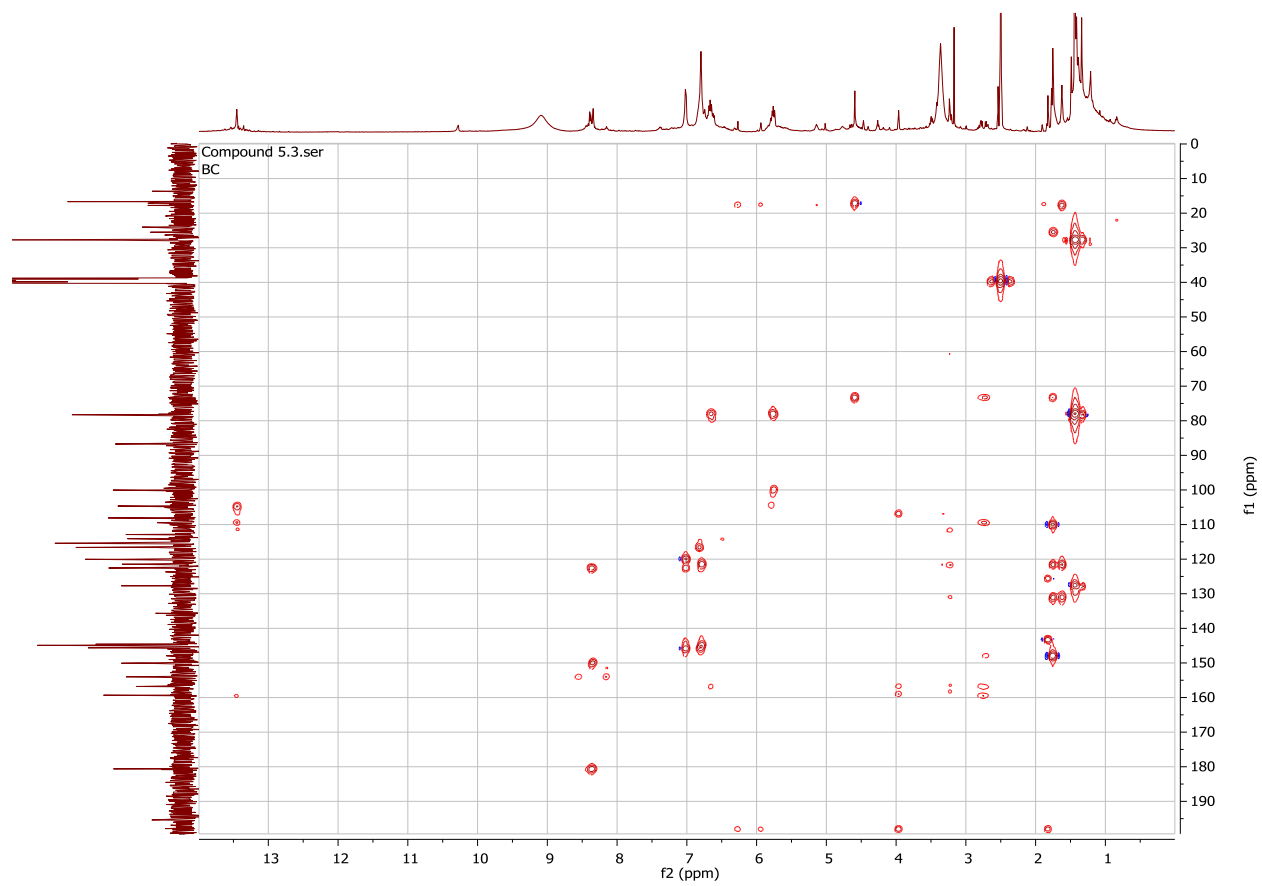

**Figure S12:** HMBC spectrum for compound **II** (DMSO-*d*<sub>6</sub>, 500 MHz)

F-7-3-4 #285 RT: 0.97 AV: 1 NL: 2.66E5  
T: FTMS - p ESI Full ms [350.0000-550.0000]

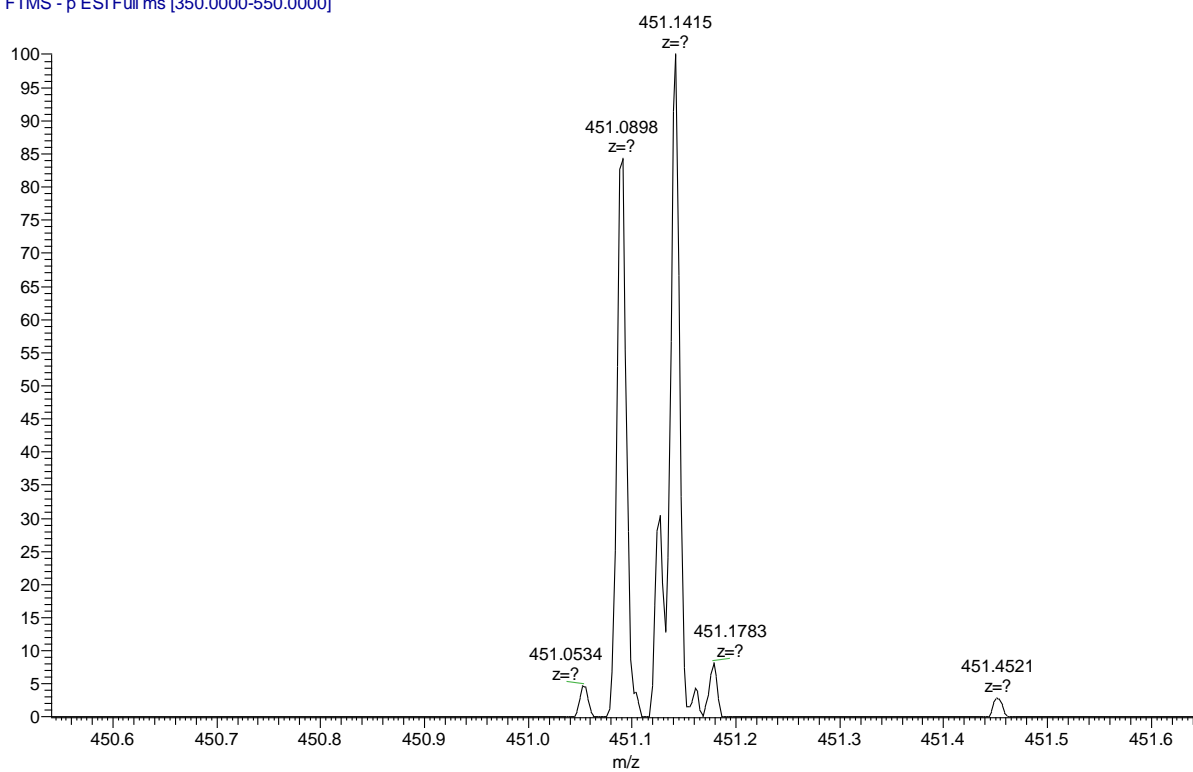

**Figure S13: FT-MS spectrum for compound II**

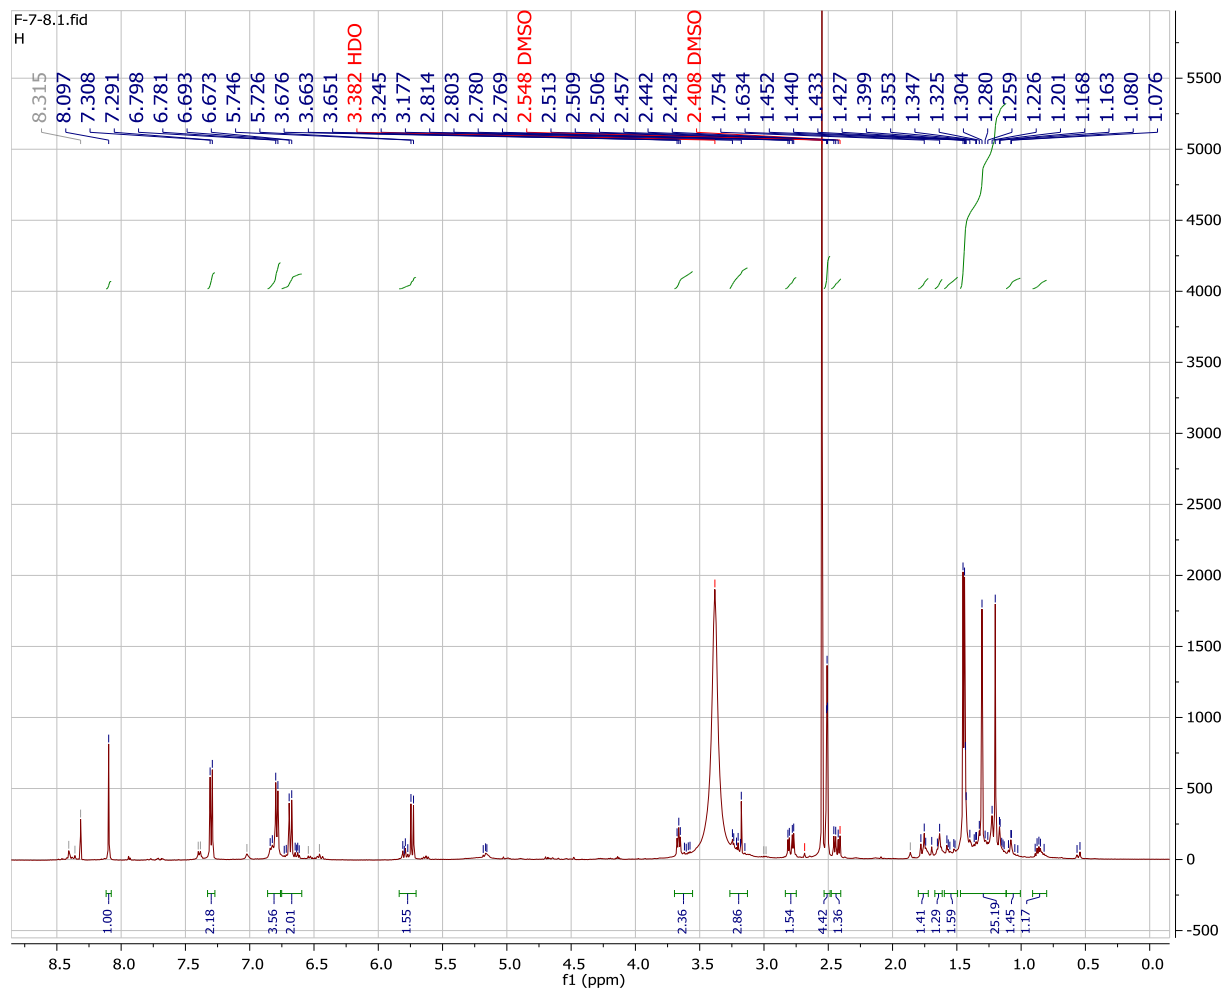

**Figure S14:**  $^1\text{H}$  NMR spectrum for compound **III** ( $\text{DMSO-}d_6$ , 500 MHz)

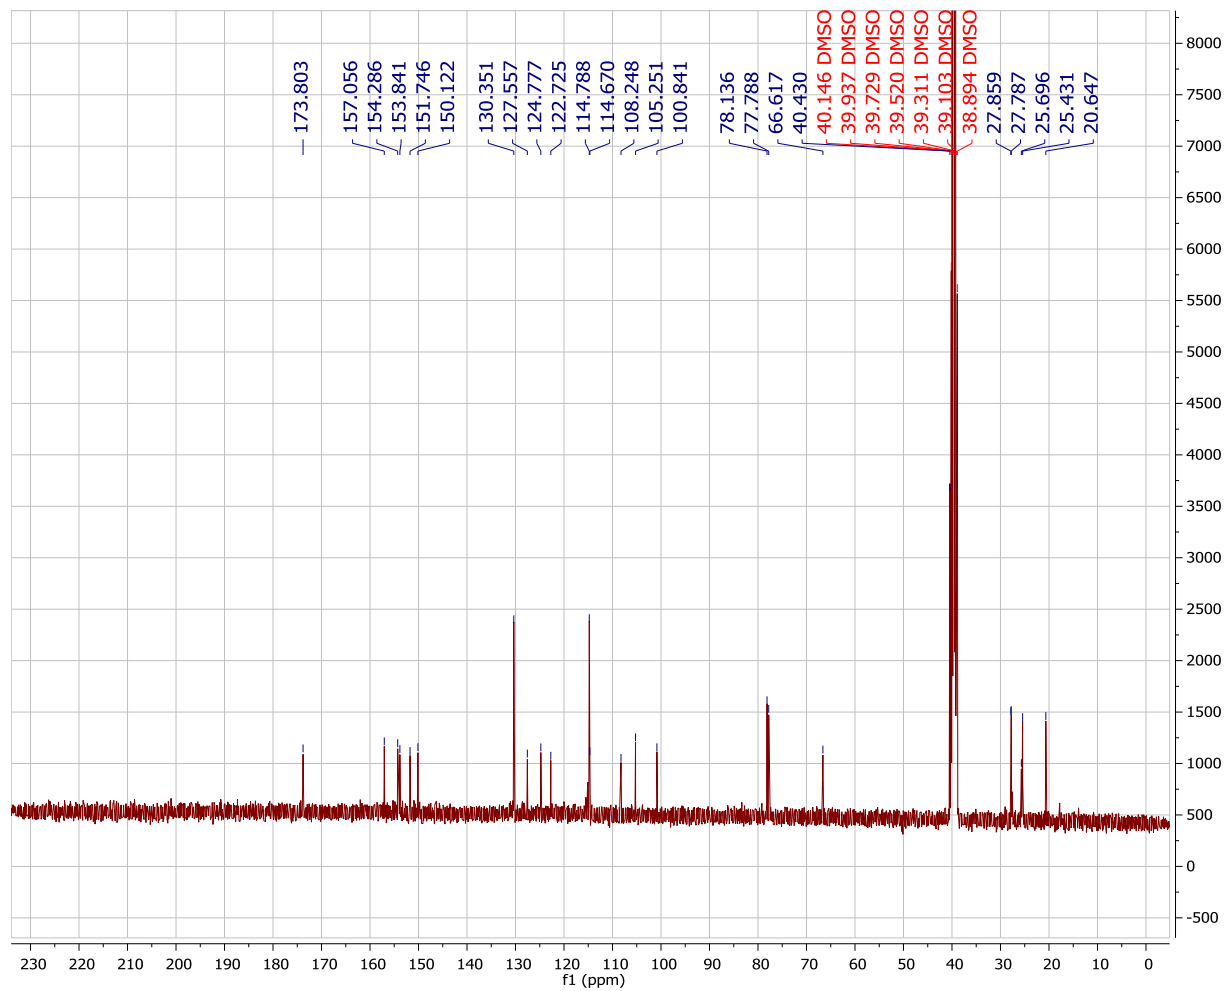

Figure S15:  $^{13}\text{C}$  NMR spectrum for compound **III** ( $\text{DMSO-}d_6$ , 125 MHz)

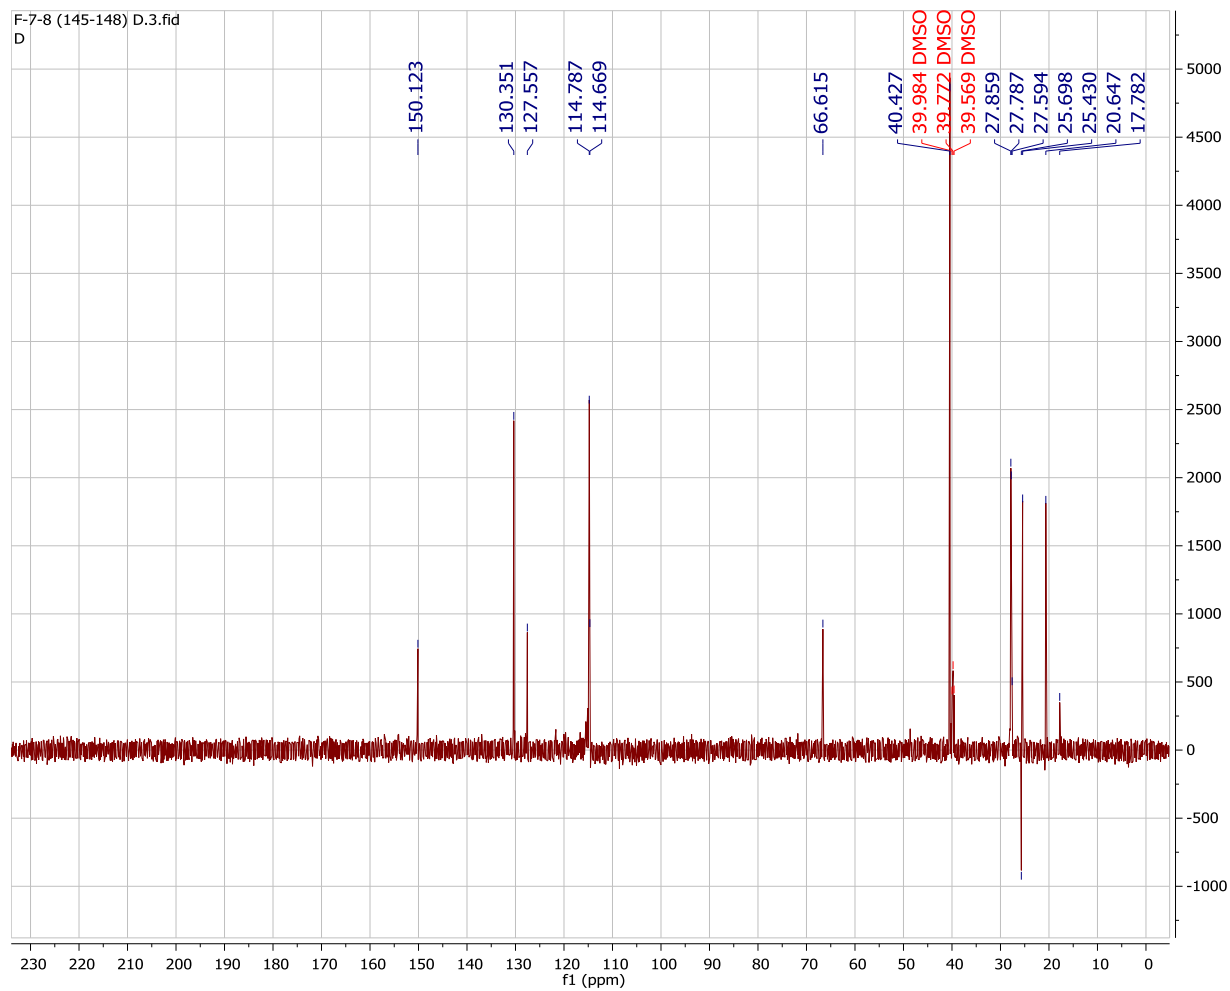

**Figure S16:** DEPT spectrum for compound **III** (DMSO-*d*<sub>6</sub>, 125 MHz)



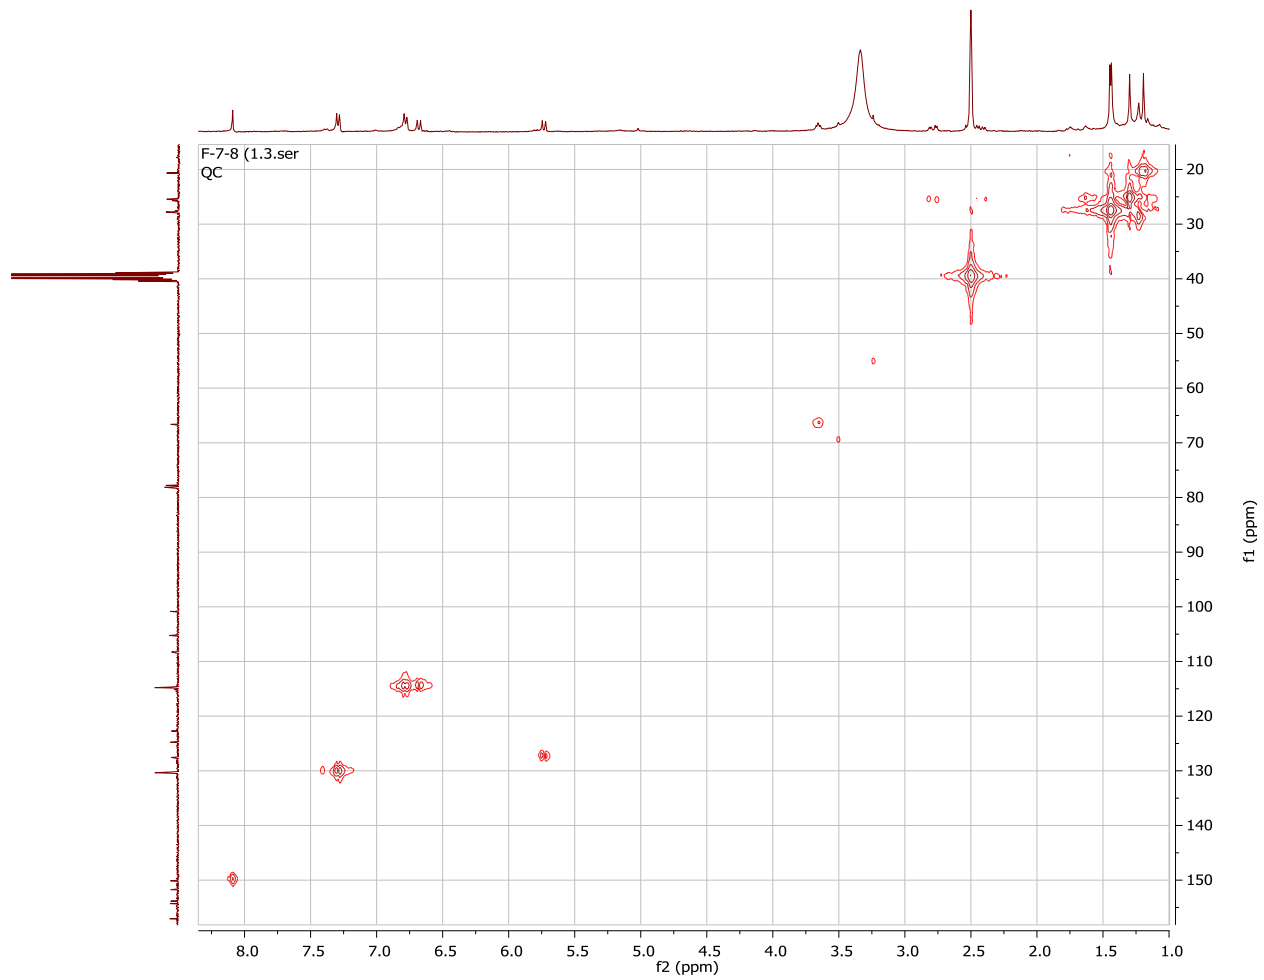

**Figure S17:** HSQC spectrum for compound **III** (DMSO-*d*<sub>6</sub>, 500 MHz)

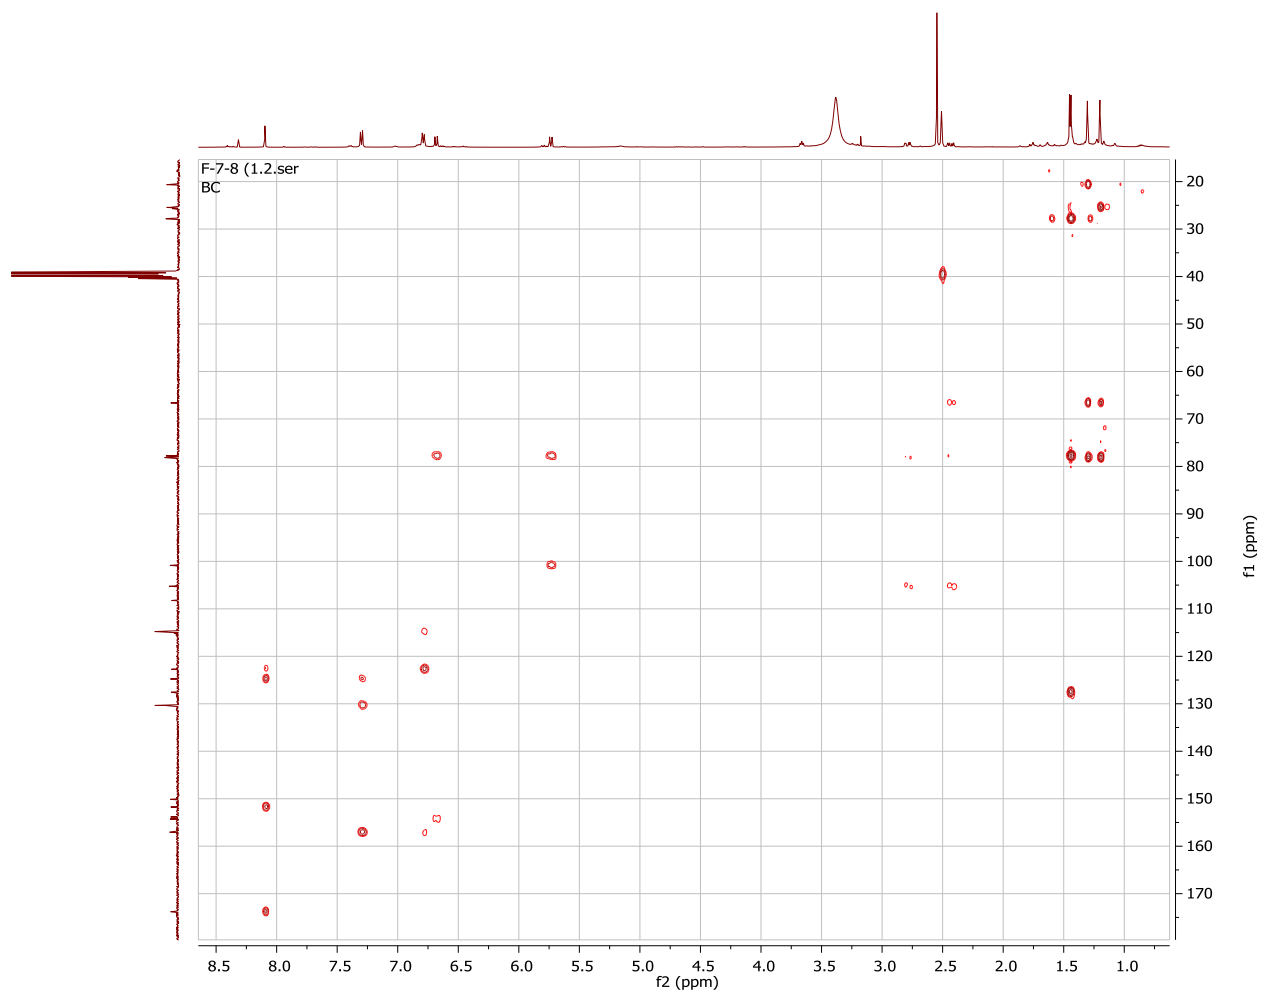

**Figure S18:** HMBC spectrum for compound **III** (DMSO-*d*<sub>6</sub>, 500 MHz)

F-7-8 #83 RT: 0.27 AV: 1 NL: 7.49E7  
T: FTMS + p ESI Full ms [200.0000-600.0000]

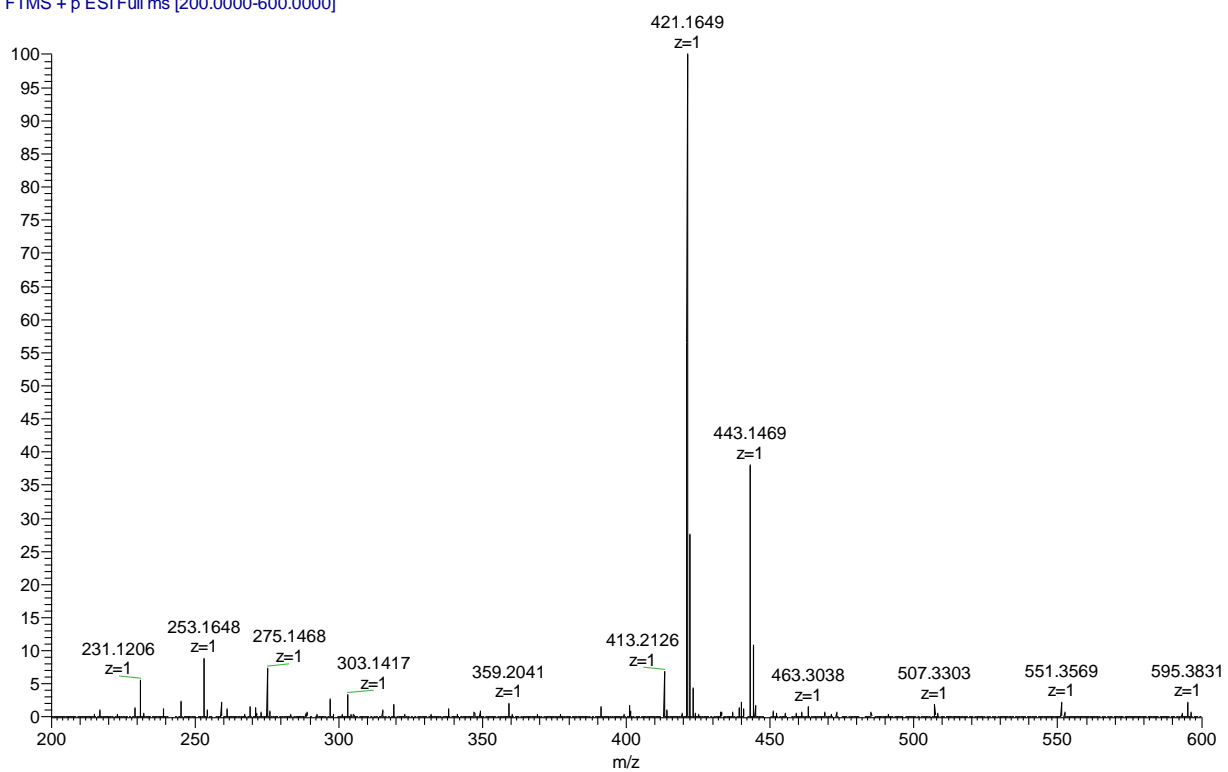

**Figure S19:** FT-MS spectrum for compound **III**

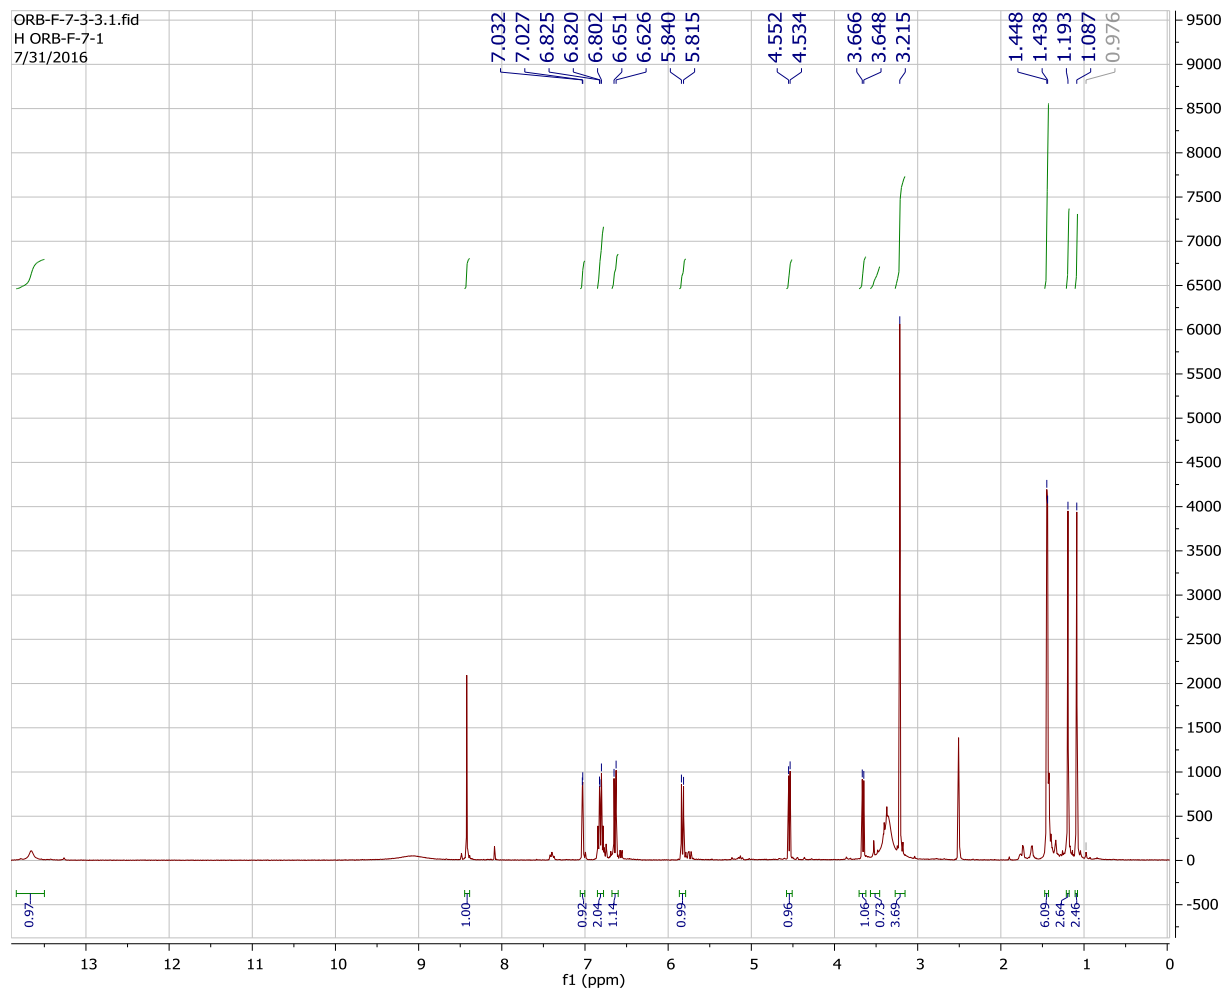

**Figure S20:**  $^1\text{H}$  NMR spectrum for compound **IV** (DMSO- $d_6$ , 400 MHz)

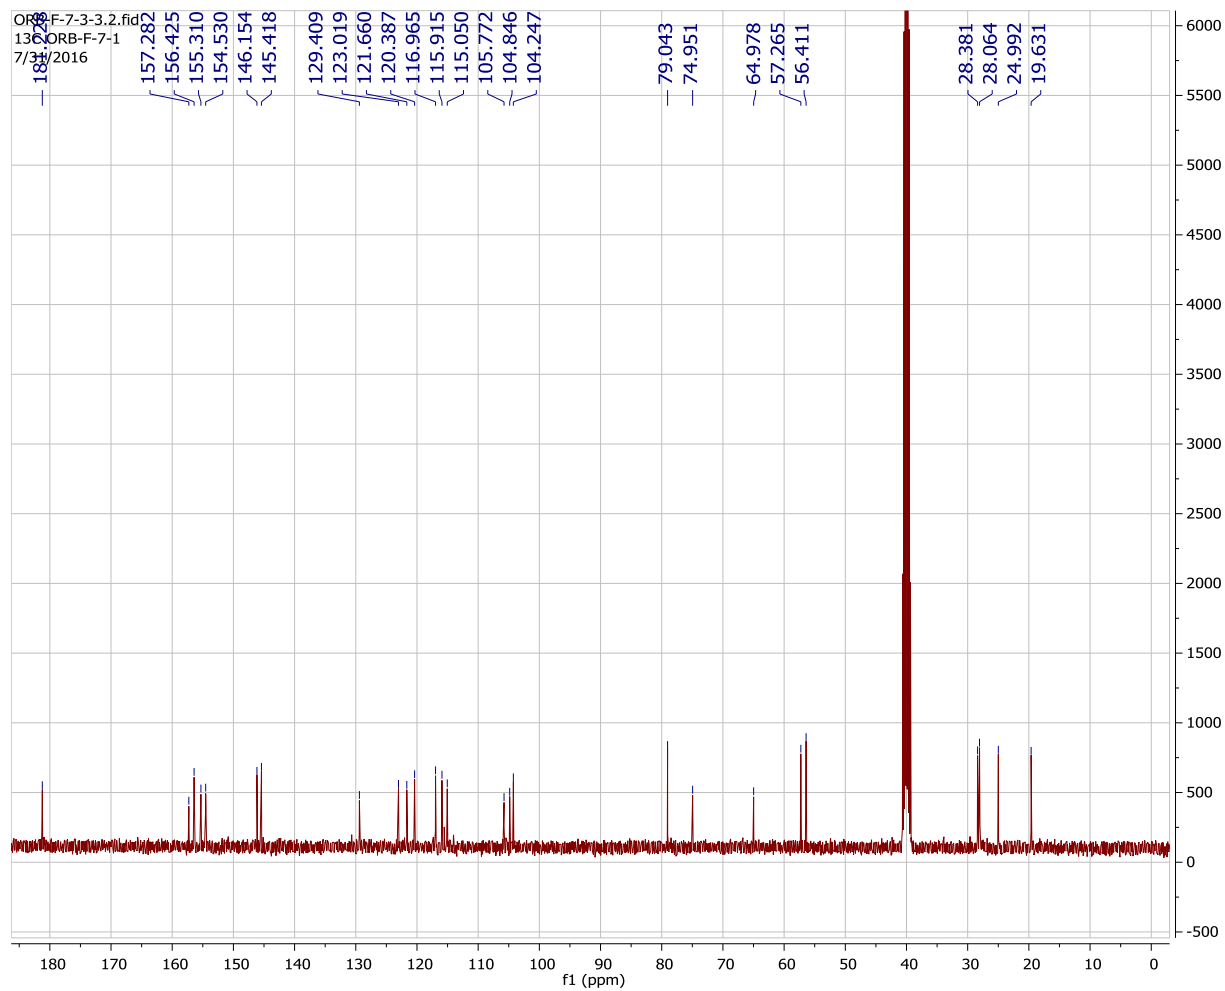

Figure S21:  $^{13}\text{C}$  NMR spectrum for compound **IV** (DMSO- $d_6$ , 100 MHz)

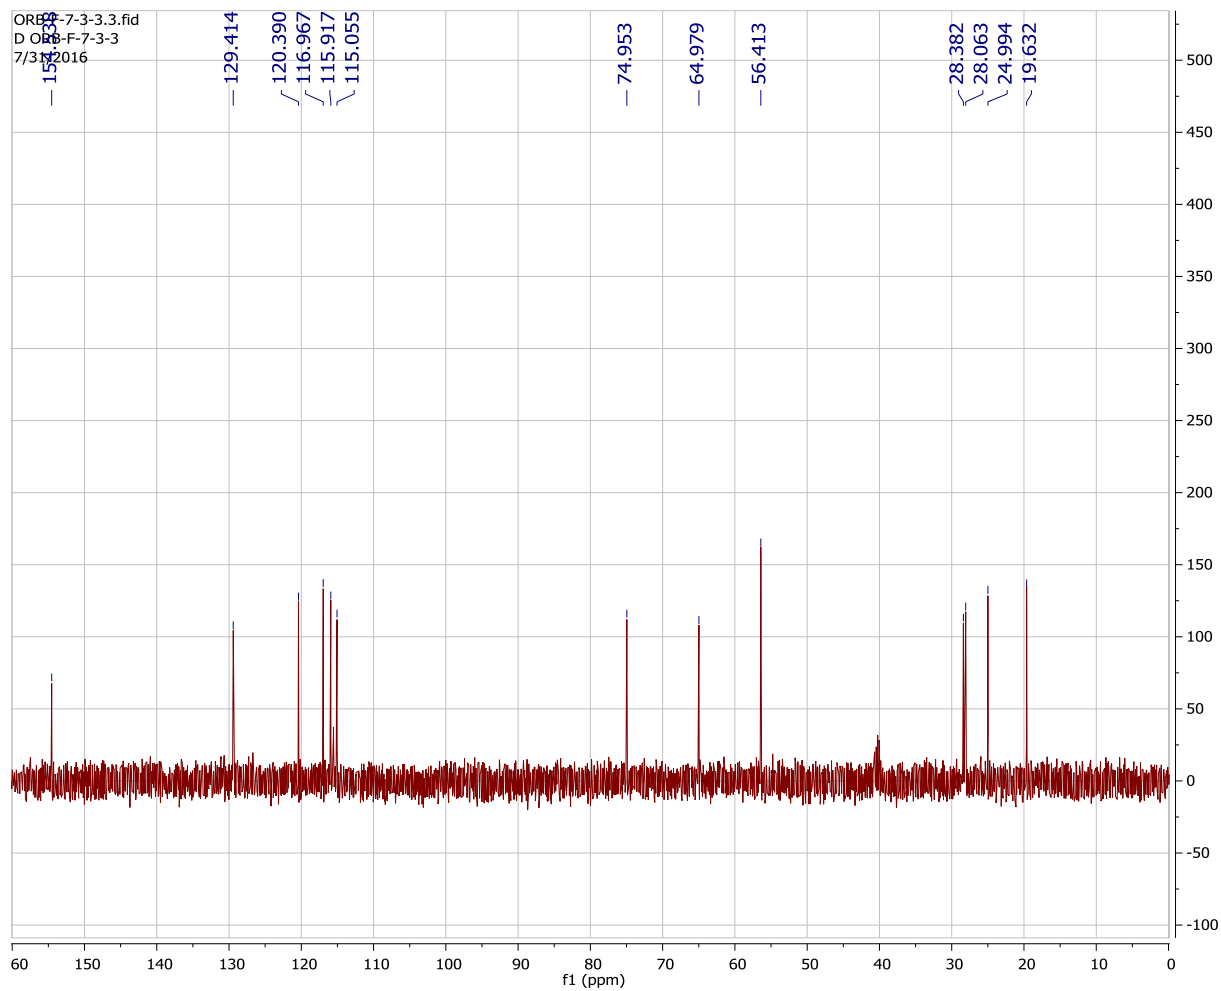

**Figure S22:** DEPT spectrum for compound **IV** (DMSO-*d*<sub>6</sub>, 100 MHz)

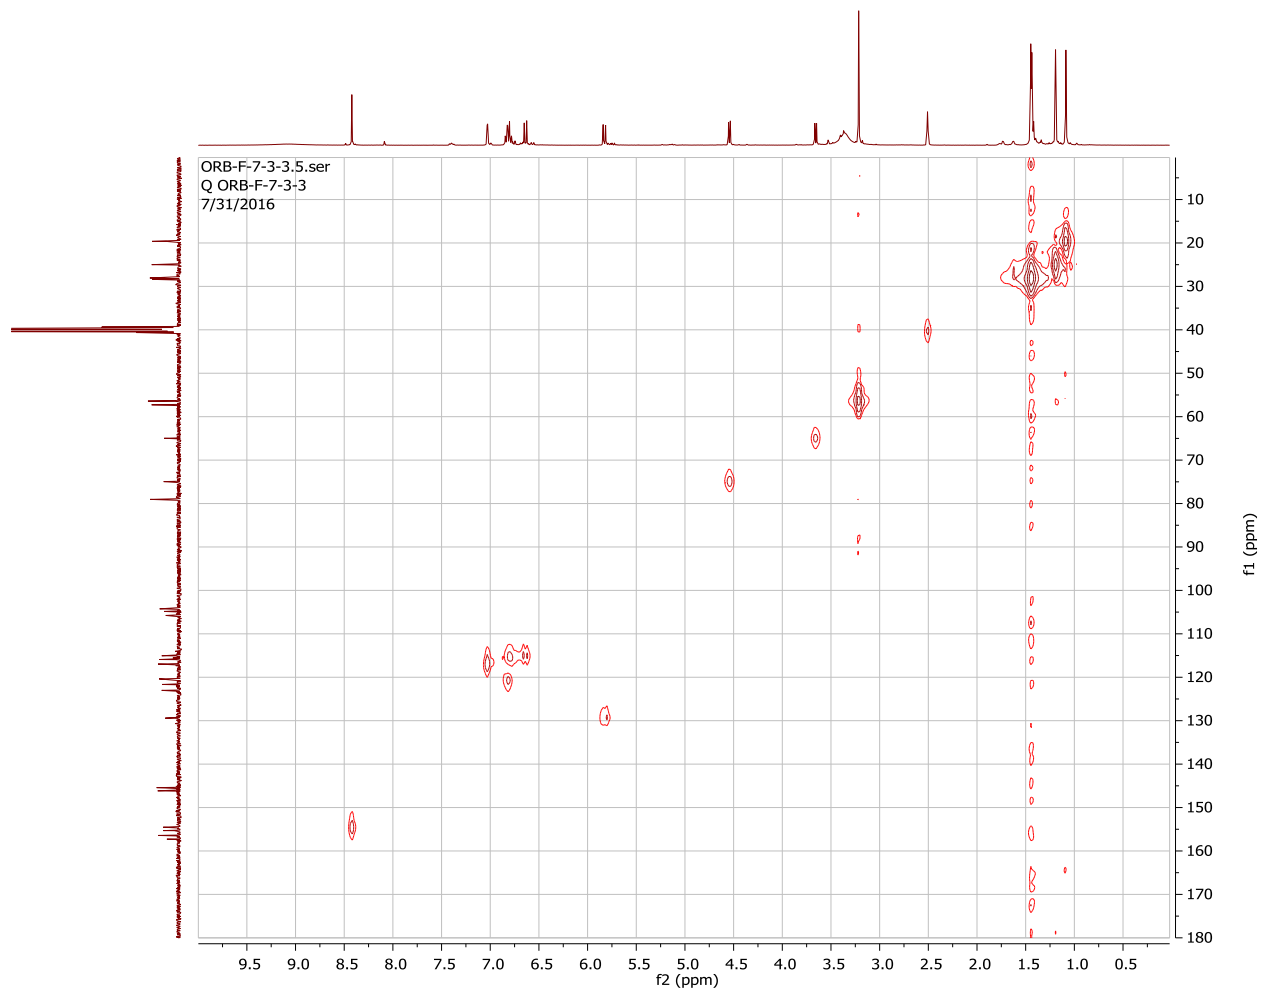

**Figure S23:** HSQC spectrum for compound **IV** (DMSO-*d*<sub>6</sub>, 400 MHz)

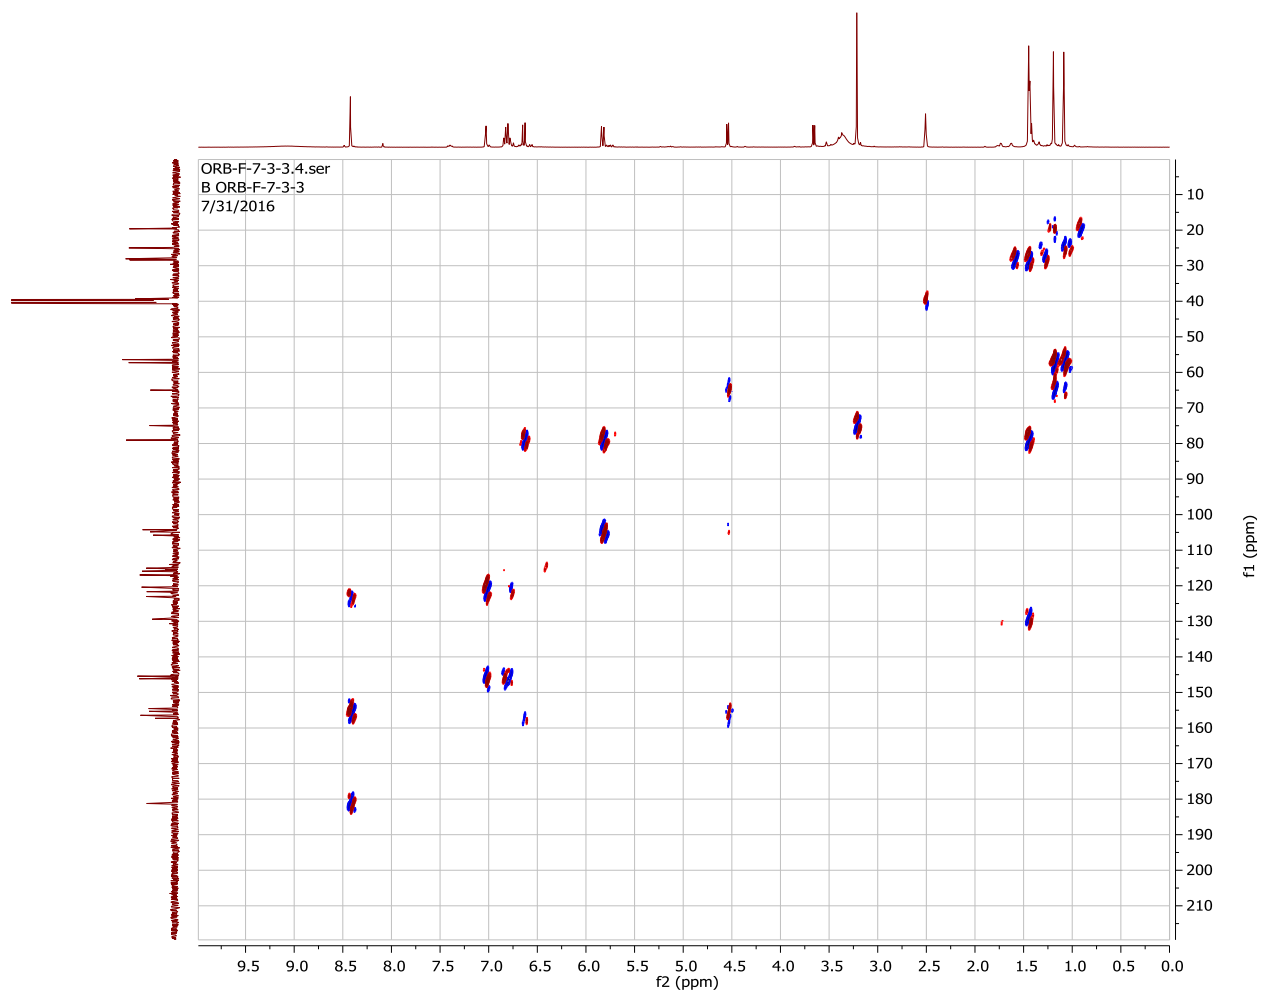

**Figure S24:** HMBC spectrum for compound **IV** (DMSO-*d*<sub>6</sub>, 400 MHz)



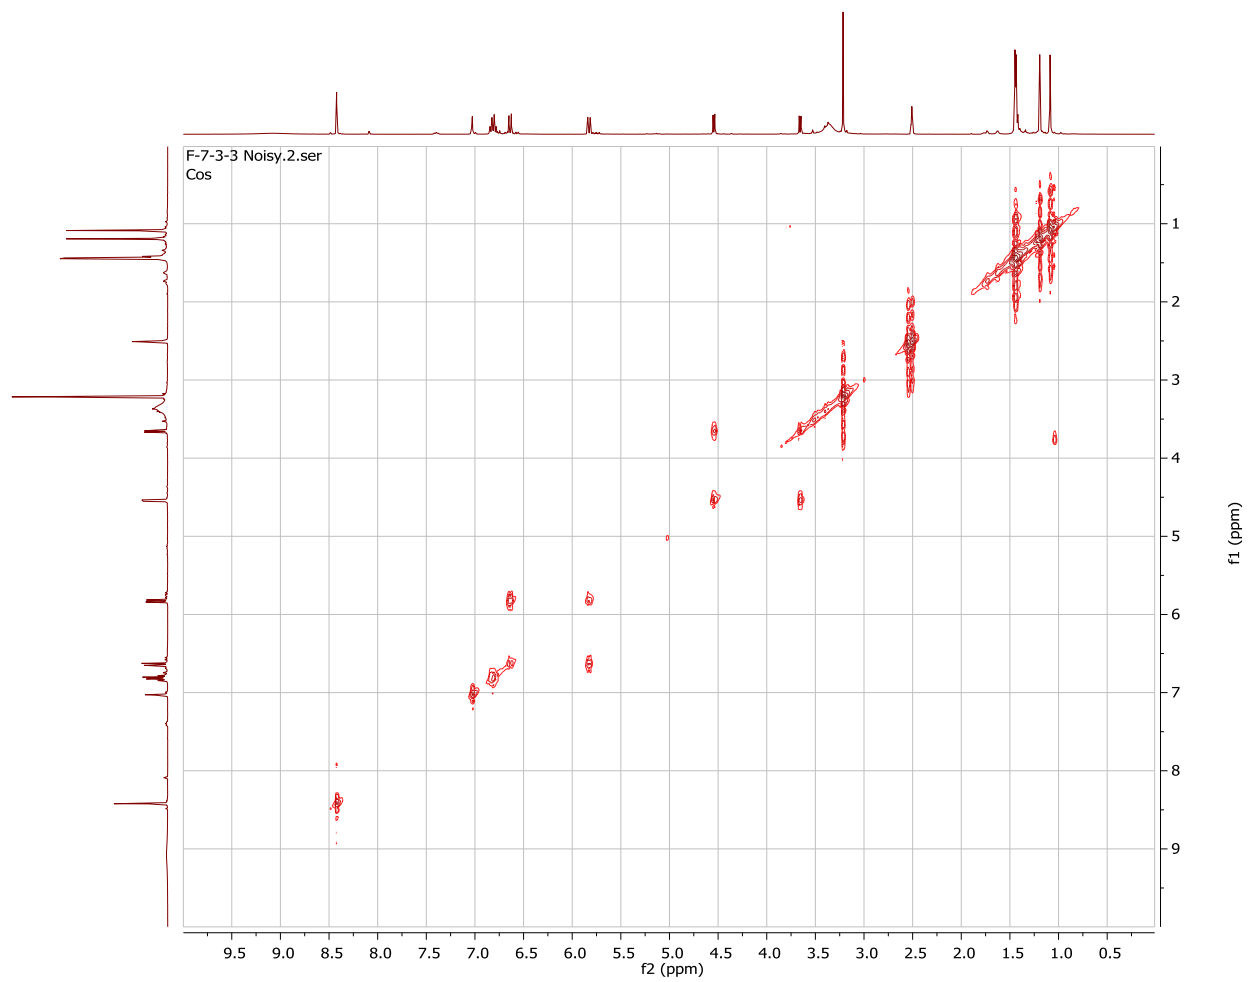

**Figure S25:** COSY spectrum for compound **IV** (DMSO-*d*<sub>6</sub>, 400 MHz)

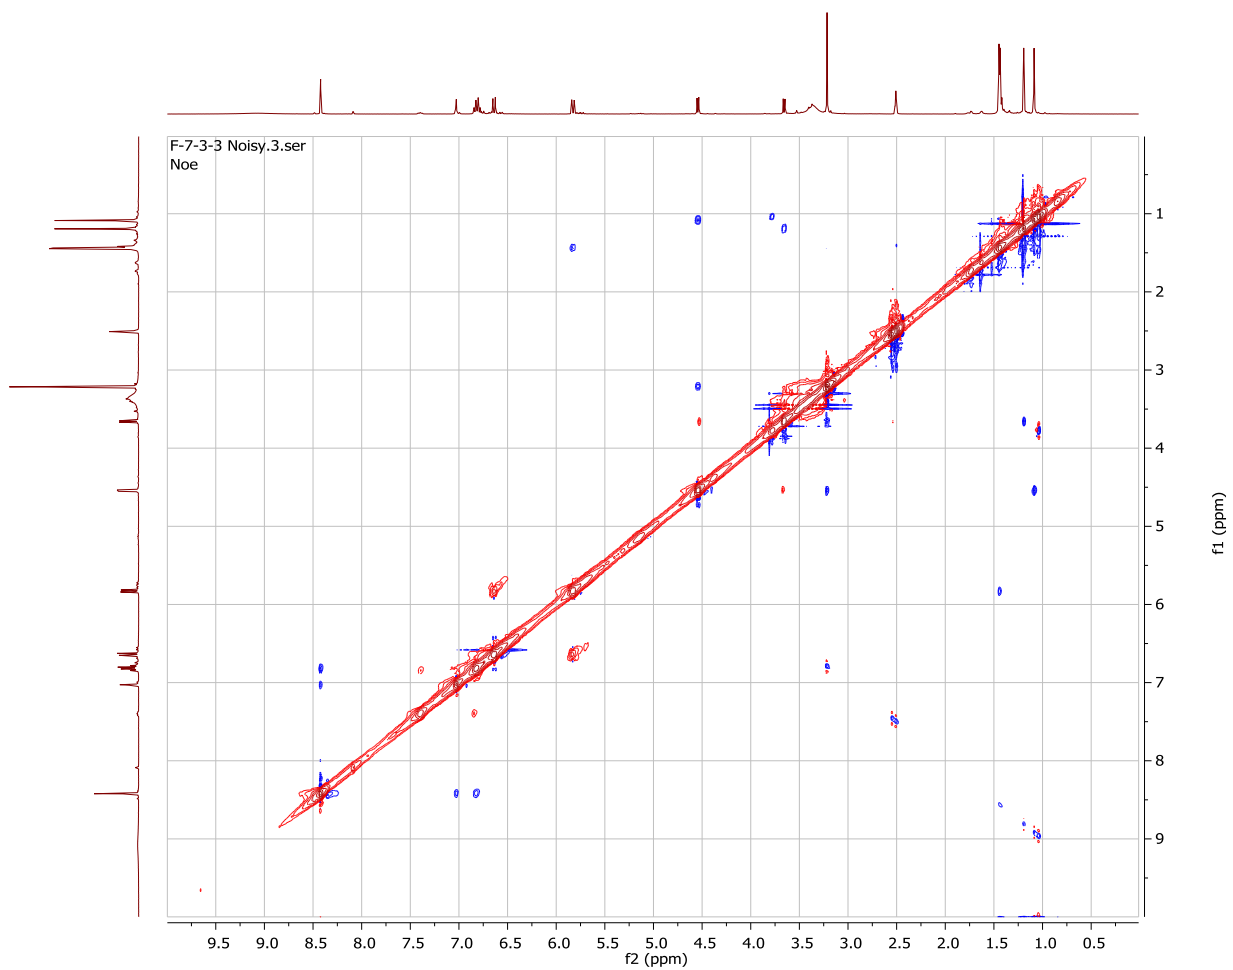

**Figure S26:** NOESY spectrum for compound **IV** (DMSO-*d*<sub>6</sub>, 400 MHz)

F-7-3-3 #128 RT: 0.61 AV: 1 NL: 9.38E6  
T: FTMS - p ESI Full ms [200.0000-600.0000]

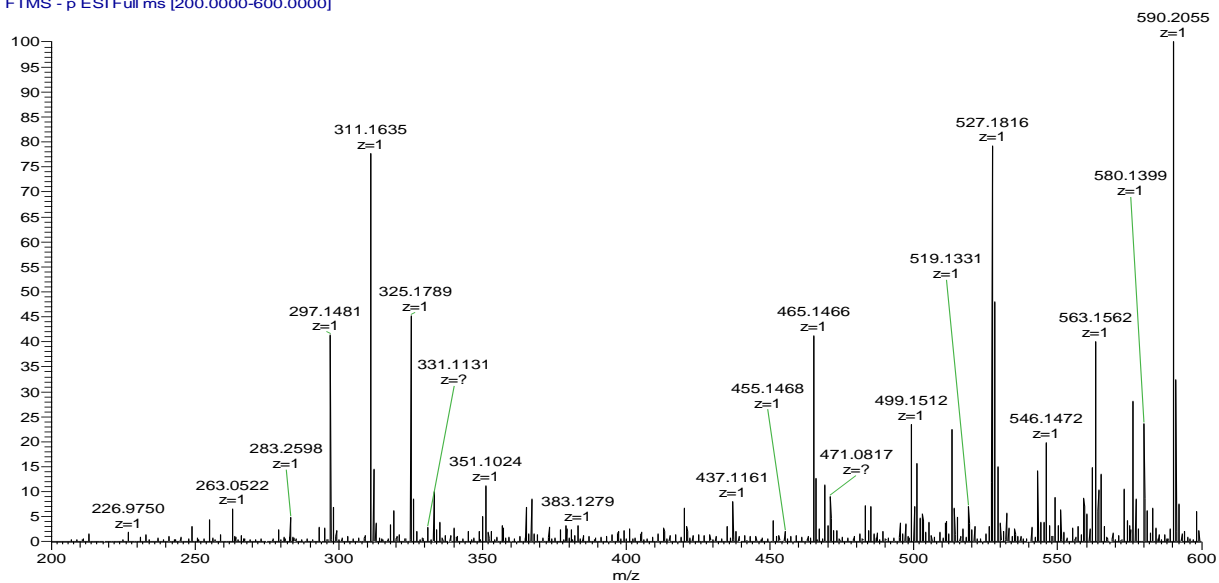

Figure S27: FT-MS spectrum for compound IV
